# Supplementary material
Source: PubMed Central journal article supplement (PMC8674801)
Supplement: jamasurg-e216356-s001.pdf [file jamasurg-e216356-s001.pdf]

## Supplementary Online Content

Knudson MM, Moore EE, Kornblith LZ, et al. Challenging traditional paradigms in posttraumatic pulmonary thromboembolism. *JAMA Surg*. Published online December 15, 2021. doi:10.1001/jamasurg.2021.6356

**eTable 1.** Summary of Timing, Symptoms, Location and Treatment of Isolated Pulmonary Thrombosis in 117 Patients

**eTable 2.** Timing of PE and DVT Detection in Patients With Pulmonary Embolism and Indications for CT Scans

**This supplementary material has been provided by the authors to give readers additional information about their work.**

**eTable 1.** Summary of Timing, Symptoms, Location and Treatment of Isolated Pulmonary Thrombosis in 117 Patients

| <b>Days from Admission to PT Detected</b> | <b>Number of Patients (total 117)</b> |
|-------------------------------------------|---------------------------------------|
| <b>Admitting Scan</b>                     | <b>28</b>                             |
| <b>Days 1-7 post injury</b>               | <b>55</b>                             |
| ➤ <b>7days post injury</b>                | <b>34</b>                             |
| <b>Location of PT</b>                     |                                       |
| <b>Main pulmonary artery</b>              | <b>8</b>                              |
| <b>Lobar artery</b>                       | <b>26</b>                             |
| <b>Segmental artery</b>                   | <b>28</b>                             |
| <b>Subsegmental artery</b>                | <b>21</b>                             |
| <b>Multiple clots</b>                     | <b>34</b>                             |
| <b>Treatment of Clots</b>                 |                                       |
| <b>Full-dose anticoagulation</b>          | <b>88</b>                             |
| <b>IVC Filter</b>                         | <b>14</b>                             |
| <b>Observation</b>                        | <b>15</b>                             |
| <b>Indications for CT Scan</b>            |                                       |
| <b>Admitting scan</b>                     | <b>28</b>                             |
| <b>Symptoms suggesting PE</b>             | <b>65</b>                             |
| <b>Incidental findings</b>                | <b>24</b>                             |

**eTable 2.** Timing of PE and DVT Detection in Patients With Pulmonary Embolism and Indications for CT Scans

| <b>Days from Admission to PE detected</b>  | <b>Number of Patients (n=40)</b> |
|--------------------------------------------|----------------------------------|
| Admit scan                                 | 8                                |
| Days 1-7                                   | 17                               |
| Days 8-14                                  | 11                               |
| >14 days                                   | 4                                |
| <b>Indications for CT Scan</b>             |                                  |
| Admitting scan                             | 8                                |
| Symptoms suggesting PE                     | 26                               |
| Incidental findings                        | 6                                |
| <b>Days from Admission to DVT detected</b> |                                  |
| Day of admission                           | 3                                |
| 1-7 days                                   | 20                               |
| 7-14 days                                  | 8                                |
| >14 days                                   | 9                                |
